# Supplementary material for: Rapid, in situ plasma functionalization of carbon nanotubes for improved CNT/epoxy composites
Source: Royal Society of Chemistry journal article supplement (doi:10.1039/c6ra23103a), 2016-01-01
Supplement: c6ra23103a1.pdf [file c6ra23103a1.pdf]

## Rapid, In-Situ Plasma Functionalization of Carbon Nanotubes for Improved CNT/Epoxy Composites

Rachit Malik<sup>1</sup>, Colin McConnell<sup>2</sup>, Noe T. Alvarez<sup>2</sup>, Mark Haase<sup>2</sup>, Seyram Gbordzoe<sup>1</sup>, Vesselin Shanov<sup>1,2\*</sup>

<sup>1</sup>Department of Mechanical & Materials Engineering, University of Cincinnati, Cincinnati, OH, USA.

<sup>2</sup>Department of Biomedical, Chemical and Environmental Engineering, University of Cincinnati, Cincinnati, OH, USA.

\*Corresponding author, e-mail: shanovvn@ucmail.uc.edu.

### Electronic Supplementary Information (ESI)

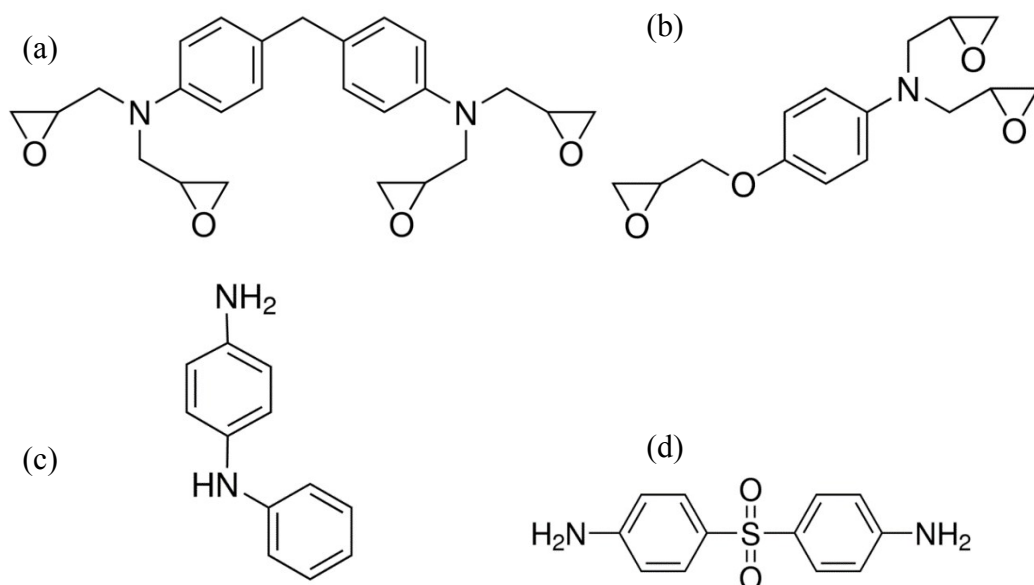

Figure S1: The epoxy resin used in this study is composed of a mixture of two epoxide compounds: (a) – 4,4-Methylenebis (N, N-diglycidylaniline); (b) – N, N-Diglycidyl-4-glycidyloxyaniline plus a combination of proprietary aromatic curing agents such as (c) – N-phenyl-p-phenylenediamine; (d) – 4-Aminophenyl sulfone.

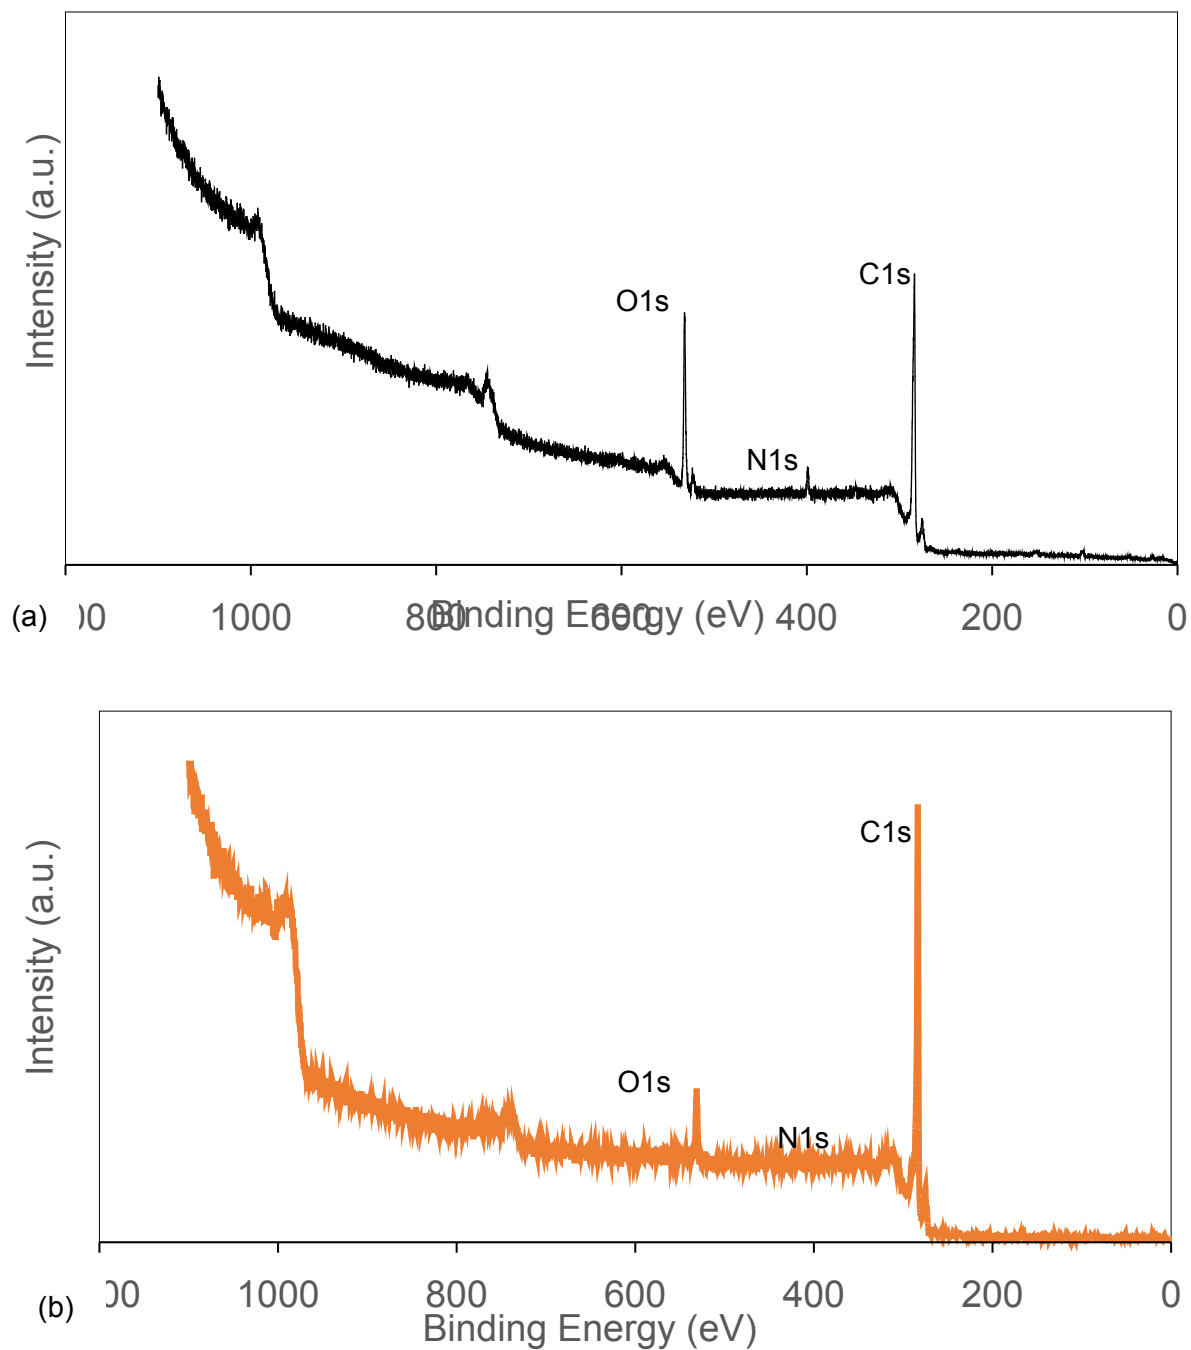

Figure S2: (a) – XPS Survey scan of plasma functionalized CNT sheets treated with epoxy solution in toluene in the absence of curing agent; (b) – XPS survey scan of plasma functionalized CNT sheet.

Table S1: Effect of plasma power (W) and %wt. CNT content on the mechanical properties of CNT/Epoxy composites and CNT sheets.

| <b>Plasma Power (W)</b> ↓ | <b>% wt. CNT Content</b> → | <b>100</b> | <b>82</b> | <b>63</b>     | <b>42</b> | <b>24</b> |
|---------------------------|----------------------------|------------|-----------|---------------|-----------|-----------|
| <b>0W</b>                 | Tensile Stress (MPa)       | 410.78     | 479.53    | 487.64        | 455.51    | 418.47    |
|                           | Modulus (GPa)              | 23.76      | 29.18     | 36.14         | 40.31     | 37.38     |
| <b>80W</b>                | Tensile Stress (MPa)       | 344.83     | 548.71    | 560.68        | 562.67    | 457.11    |
|                           | Modulus (GPa)              | 22.36      | 39.91     | 42.6          | 51.23     | 48.67     |
| <b>100W</b>               | Tensile Stress (MPa)       | 331.30     | 624.56    | <b>698.17</b> | 646.35    | 595.52    |
|                           | Modulus (GPa)              | 22.56      | 44.78     | <b>64.51</b>  | 70.36     | 54.27     |
